# Supplementary material
Source: Springer Nature journal article supplement (https://www.springermedizin.de/resource/supplementary/12906_2011_526_MOESM5_ESM.pdf/9519942)

**A****Fraction F1**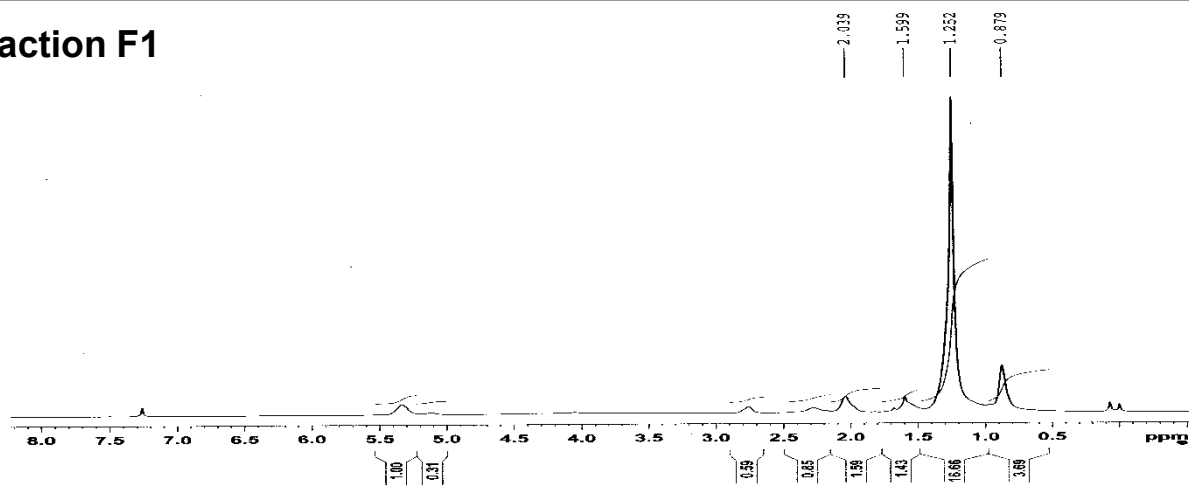**B****Fraction F3**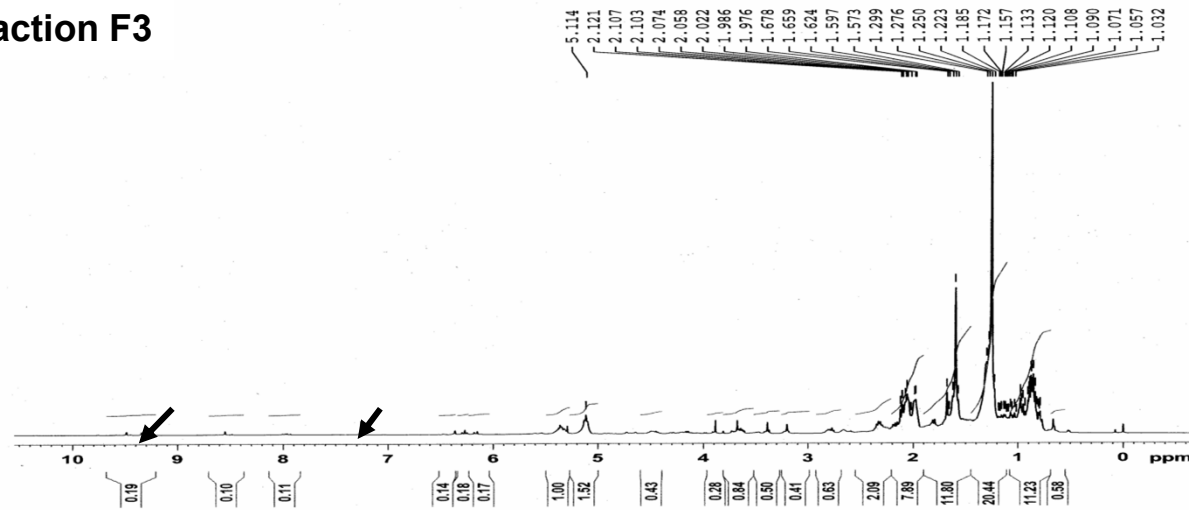**C****Fraction F4**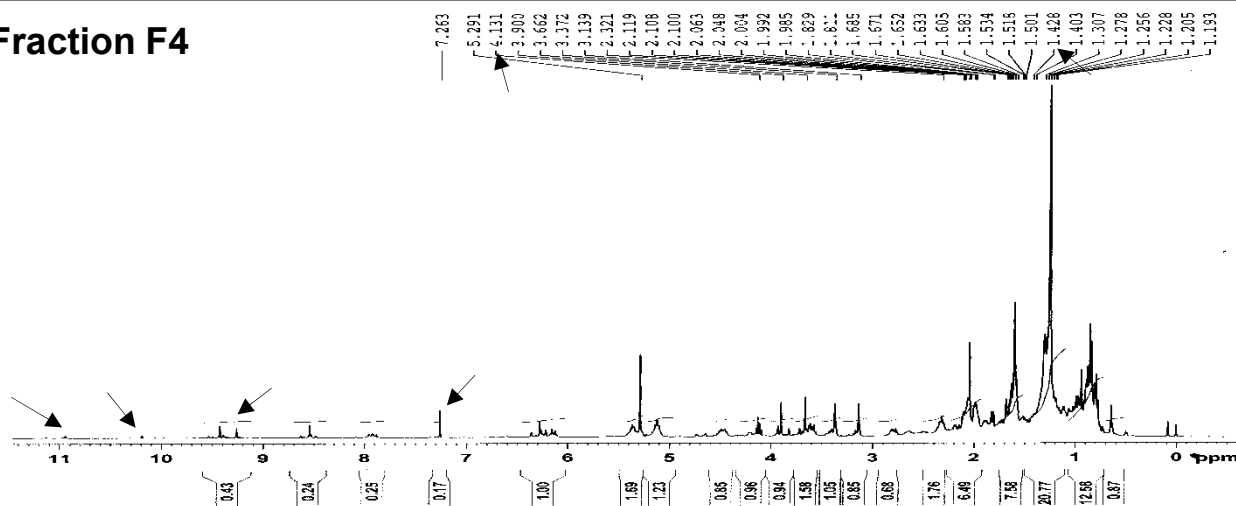

Supplement: MOESM5 [file 9519942]
